# Supplementary material for: Effects of Lactiplantibacillus plantarum OLL2712 on Memory Function in Older Adults with Declining Memory: A Randomized Placebo-Controlled Trial
Source: MDPI journal article supplement (doi:10.3390/nu14204300), 2022-10-14
Supplement: s1 [file s1]

**Table S2. Measures of visual, verbal, and composite memory in Cognitrax**

| Test Name           | Example of screen                                                                   | Test Procedure                                                                                                                                                                                                                                                                                                                              | Score Calculation                                                                                                                                                                                                  |
|---------------------|-------------------------------------------------------------------------------------|---------------------------------------------------------------------------------------------------------------------------------------------------------------------------------------------------------------------------------------------------------------------------------------------------------------------------------------------|--------------------------------------------------------------------------------------------------------------------------------------------------------------------------------------------------------------------|
| Visual Memory (VIM) | 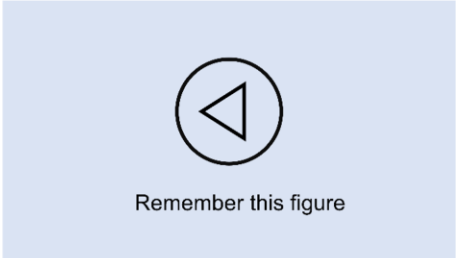  | VIM measures memory function for words. First, 15 figures are presented, one every 2 seconds, and the subject memorizes them. After that, 30 figures, including new figures, are presented, one every 2 seconds, and the subject identifies the figure that he/she memorized. Then, after 25 minutes, there is a delayed recognition trial. | Number of correct hits for immediate recognition +<br>Number of correct passes for immediate recognition +<br>Number of correct hits for delayed recognition +<br>Number of correct passes for delayed recognition |
| Verbal Memory (VBM) |  | VBM measures memory function for words. First, 15 words are presented, one every 2 seconds, and the subject memorizes them. After that, 30 words, including new words, are presented, one every 2 seconds, and the subject identifies the word that he/she memorized. Then, after 25 minutes, there is a delayed recognition trial.         | Number of correct hits for immediate recognition +<br>Number of correct passes for immediate recognition +<br>Number of correct hits for delayed recognition +<br>Number of correct passes for delayed recognition |
| Composite Memory    |                                                                                     |                                                                                                                                                                                                                                                                                                                                             | VIM score +<br>VBM score                                                                                                                                                                                           |
